# Supplementary material
Source: Springer Nature journal article supplement (https://www.springermedizin.de/resource/supplementary/12889_2013_5186_MOESM1_ESM.pdf/9494806)
Supplement: MOESM1 [file 9494806]

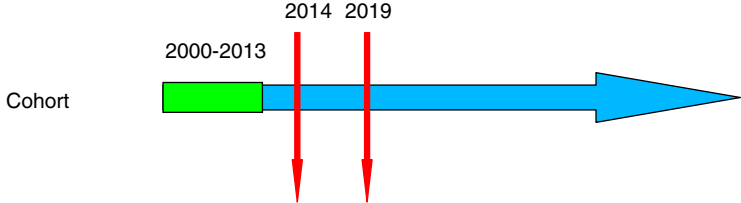

 Inclusion period, Exposure assessment

 Medical follow –up (vital status, incidence of leukaemia and solid cancers)

 Statistical Analysis
